# Supplementary material for: Blue Light Damage and p53: Unravelling the Role of p53 in Oxidative-Stress-Induced Retinal Apoptosis
Source: MDPI journal article supplement (doi:10.3390/antiox12122072), 2023-12-04
Supplement: s1 [file s1]

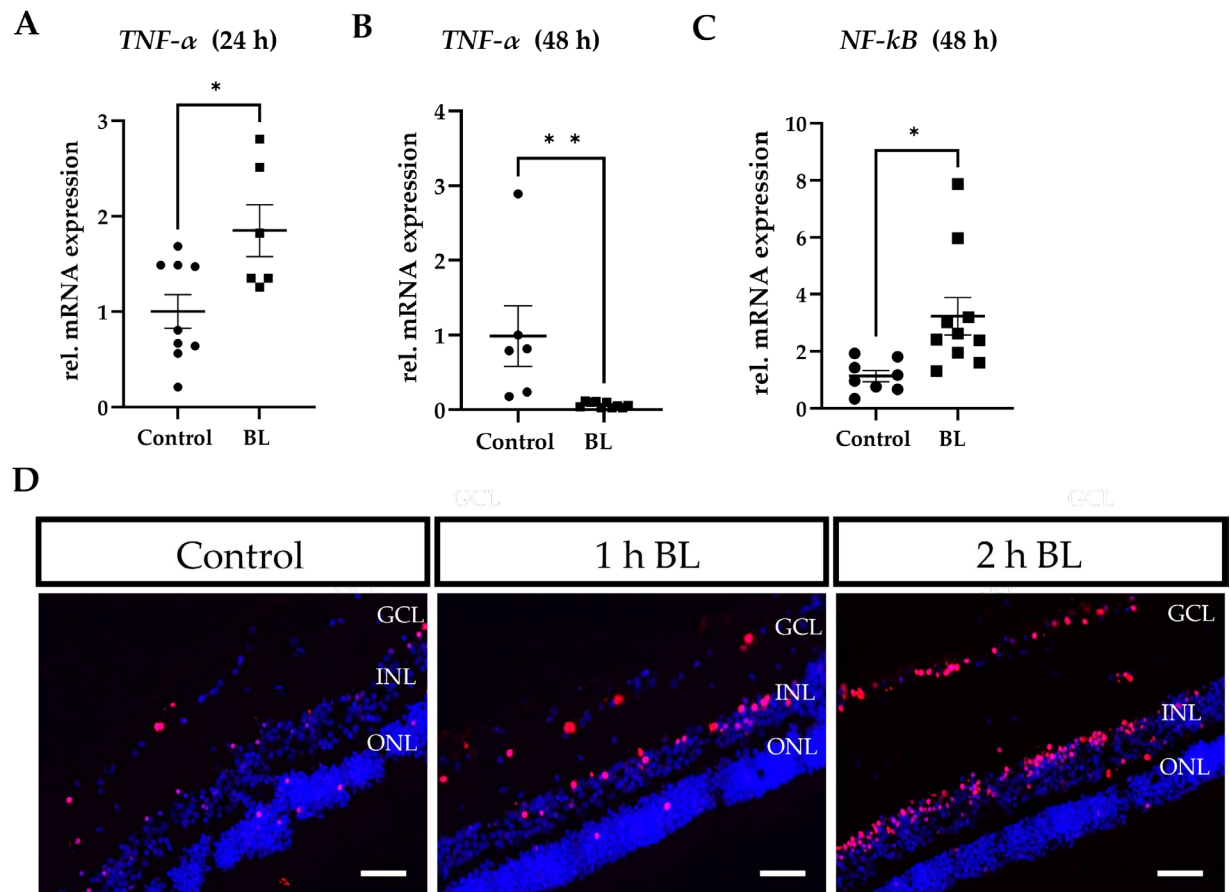

**Figure S1.** Blue light induced time and duration dependent cell death in retinal explants.

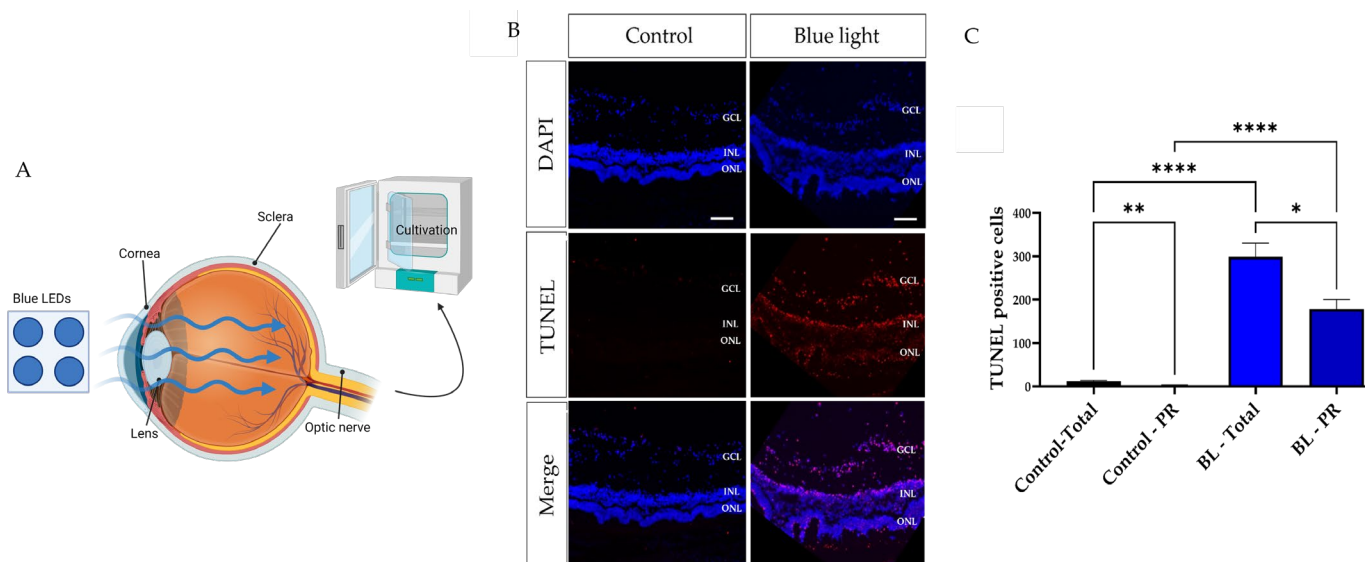

**Figure S2.** Blue light increased apoptotic cells in exposed whole pig eyes.

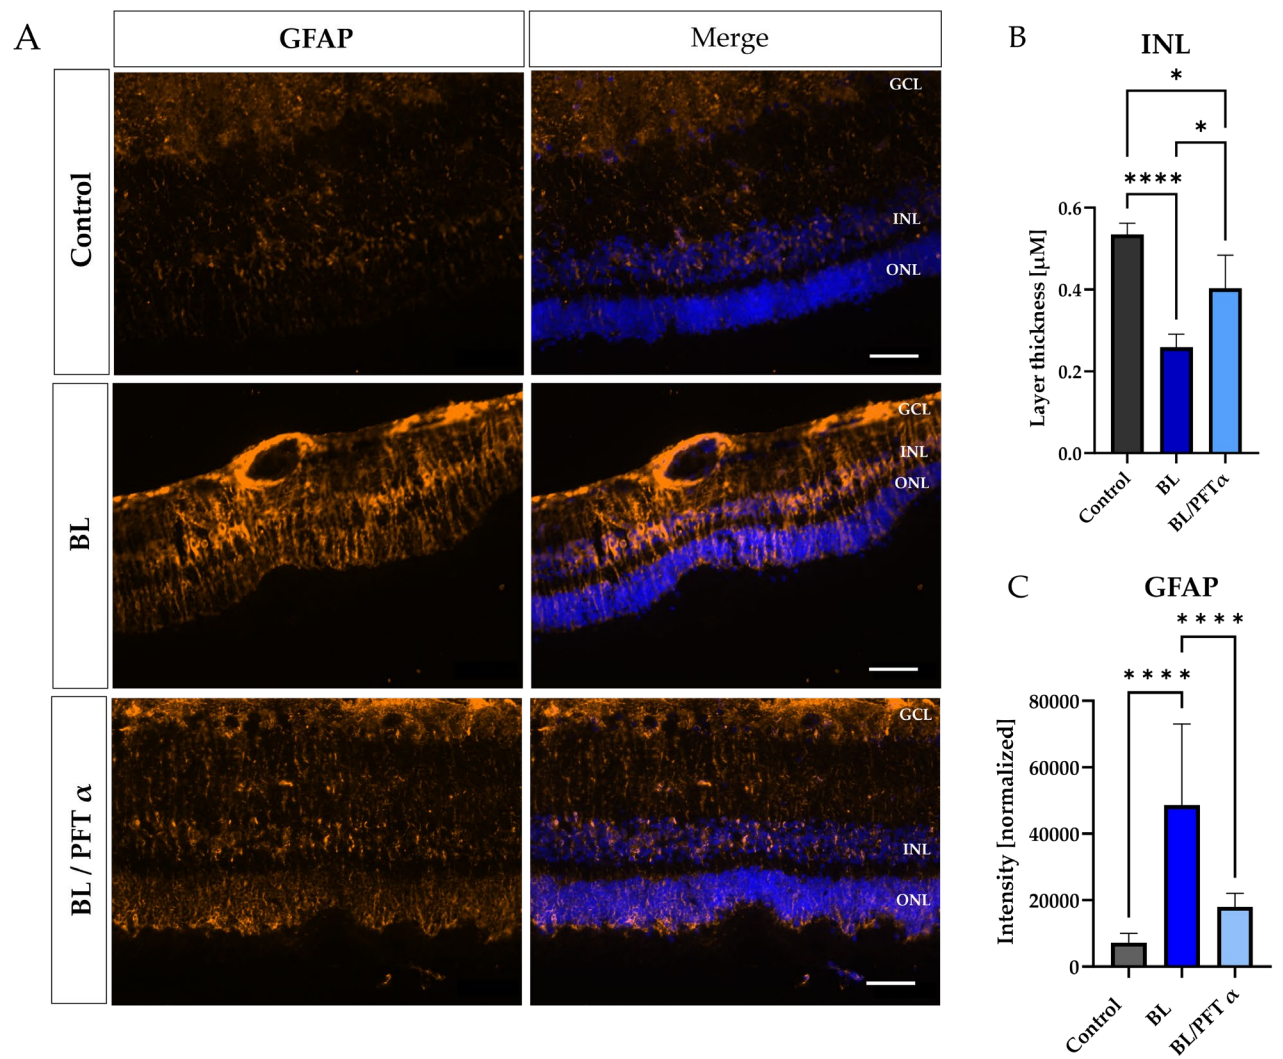

**Figure S3.** Inhibition of p53 decreases Müller cell activation after BL-exposure in porcine retinal explants.
